# Supplementary material
Source: PubMed Central journal article supplement (PMC1356342)
Supplement: 7600774s1.pdf [file 7600774s1.pdf]

## Supplementary Material

### Cell culture and transfection

HEK293 cells were grown in Dulbecco's Modified Eagle Medium (Sigma) containing 10% fetal bovine serum under 5% CO<sub>2</sub> atmosphere. The cells were transiently transfected with the expression vector by the FuGENE6 transfection reagent according to the instructions provided by the manufacturer (Roche, Mannheim, Germany).

### Plasmids

For pcDNA3.1(+)Myc and FLAG vector, Oligo DNAs encoding N-terminal Myc and the FLAG epitope were ligated into the *KpnI/BamHI* site of pcDNA3.1(+) (Invitrogen, San Diego, CA). We amplified the cDNA of wild-type (WT), N-terminal, C-terminal and both terminal deletion mutants of parkin and wild-type  $\alpha$ -SN by polymerase chain reaction (PCR) with appropriate primers and ligated them into *EcoRI/NotI* site for parkin and *NotI/XhoI* site for  $\alpha$ -SN of the vectors. We prepared missense mutants of parkin and  $\alpha$ -SN by mutating each wild type plasmids using the Quik Change site-directed mutagenesis kit (Stratagene, La Jolla, CA) according to the protocol provided by the manufacturer. pcDNA3.1(+)Myc14-3-3 $\eta$  was kindly provided by H. Ichinase, pGEX-3X14-3-3 $\eta$  by T. Ichimura and pcDNA3.1(+)V5-synphilin-1 by S. Ishigaki. The expression vectors of FLAG-UbcH7 and Ubc7 were described previously (Shimura *et al.*, 2000).

### **Surface plasmon resonance (SPR) analysis**

The SPR study was performed on a Biacore 2000 instrument (Biacore AB, Uppsala, Sweden). 14-3-3 $\eta$  and  $\alpha$ -SN were expressed in *E. coli* while parkin was expressed in Sf9 cells. For studies of parkin binding to 14-3-3 $\eta$ , 14-3-3 $\eta$  was covalently linked to the surface of a CM5 Chip (Biacore) using amino-coupling via 1-ethyl-3-(3-dimethylaminopropyl)-carbodiimide HCl and *N*-hydroxysuccinimide at final densities of 5000 resonance unit (RU) and parkin was used for analysis. For studies of  $\alpha$ -SN binding to 14-3-3 $\eta$ ,  $\alpha$ -SN was linked to CM5 sensor chip at a final density of 3000 RU and 14-3-3 $\eta$  was used for analyte. Blank surface treated without ligand was used as a control in each individual affinity analysis. Binding experiments were performed in PBS and 1 mM dithiothreitol at 25°C. Five different concentrations were used for each analysis. Analysis of the binding experiments was performed using the BIAevaluation v3.0 software package (Biacore).
